# Supplementary material
Source: PubMed Central journal article supplement (PMC1890476)

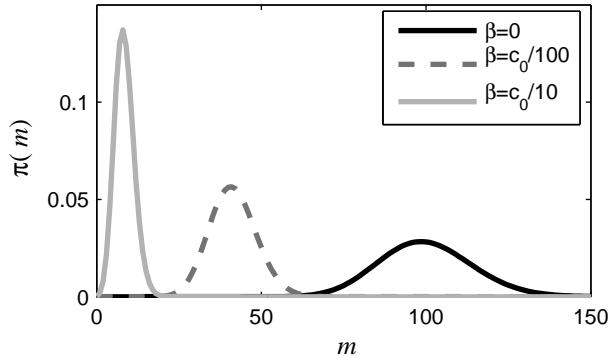

Supplement: pnas_0610987104_1.pdf [file pnas_0610987104_1.pdf]

(a)

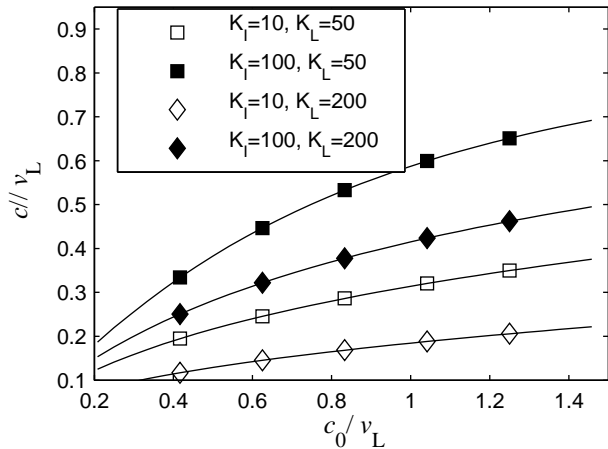

(b)

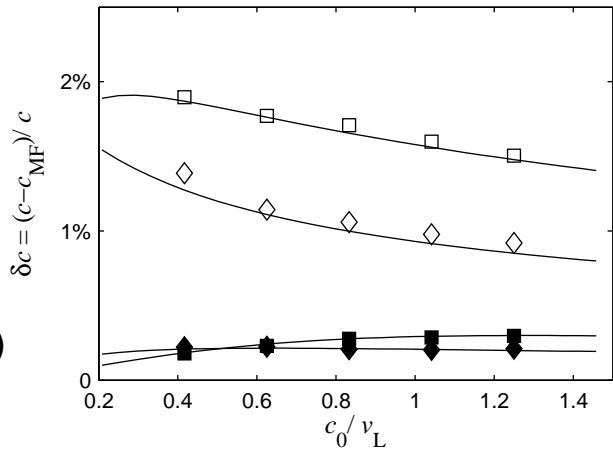

Supplement: pnas_0610987104_2.pdf [file pnas_0610987104_2.pdf]
